# Supplementary material for: Learning speed and detection sensitivity controlled by distinct cortico-fugal neurons in visual cortex
Source: eLife. 2020 Dec 7;9:e59247. doi: 10.7554/eLife.59247 (PMC7748414; doi:10.7554/eLife.59247)
Supplement: Figure 1—figure supplement 2—source data 1. [file elife-59247-fig1-figsupp2-data1.xlsx]

## Sheet: Figure 1 - Figure Supplement 2A
Blank trials cumulative probability of licking
day	cum. time window	0	0.1	0.2	0.3	0.4	0.5	0.6	0.7	0.8	0.9	1	1.1	1.2	1.3	1.4	1.5	1.6	1.7	1.8	1.9	2	2.1	2.2	2.3	2.4	2.5	2.6	2.7	2.8	2.9	3	3.1	3.2	3.3	3.4	3.5	3.6	3.7	3.8	3.9	4
1	population average	0	0.0822893	0.151691	0.204189	0.281037	0.331459	0.366177	0.409459	0.451836	0.482573	0.503463	0.522209	0.54113	0.57387	0.591497	0.605101	0.614855	0.627306	0.644977	0.660026	0.663744	0.675451	0.685234	0.688877	0.698548	0.709052	0.71647	0.73274	0.738193	0.742763	0.747797	0.747797	0.758042	0.759567	0.768078	0.777832	0.780025	0.787012	0.787012	0.794801	0.802664
4	population average	0	0.0555556	0.148148	0.148148	0.148148	0.185185	0.185185	0.185185	0.185185	0.222222	0.240741	0.277778	0.296296	0.314815	0.351852	0.37037	0.37037	0.37037	0.388889	0.425926	0.444444	0.481481	0.481481	0.481481	0.518519	0.555556	0.592593	0.592593	0.62963	0.648148	0.666667	0.685185	0.740741	0.759259	0.759259	0.777778	0.833333	0.851852	0.87037	0.87037	0.888889
14	population average	0	0	0	0.0181818	0.0363636	0.0363636	0.0363636	0.0545455	0.0727273	0.0727273	0.0727273	0.0909091	0.0909091	0.109091	0.109091	0.109091	0.109091	0.109091	0.127273	0.163636	0.218182	0.218182	0.236364	0.254545	0.254545	0.254545	0.254545	0.272727	0.272727	0.272727	0.272727	0.290909	0.327273	0.363636	0.363636	0.363636	0.363636	0.363636	0.381818	0.381818	0.418182
day	cum. Time window	0	0.1	0.2	0.3	0.4	0.5	0.6	0.7	0.8	0.9	1	1.1	1.2	1.3	1.4	1.5	1.6	1.7	1.8	1.9	2	2.1	2.2	2.3	2.4	2.5	2.6	2.7	2.8	2.9	3	3.1	3.2	3.3	3.4	3.5	3.6	3.7	3.8	3.9	4
1	population SEM	0	0.0142492	0.0295871	0.0347361	0.0430918	0.0520698	0.0559077	0.0619684	0.0592517	0.0642651	0.0670758	0.0693487	0.0739189	0.0738961	0.0745682	0.0784464	0.0793721	0.0794056	0.0816332	0.0792584	0.0796168	0.0794193	0.0765571	0.0739524	0.0712743	0.0727505	0.0729619	0.07436	0.0730128	0.0726224	0.0735542	0.0708579	0.0702759	0.069766	0.069706	0.069291	0.0681633	0.0677646	0.069259	0.0665231	0.0615005
4	population SEM	0	0.0385227	0.0531205	0.0626858	0.0734823	0.0795374	0.0851944	0.0914816	0.0952838	0.0940268	0.0991303	0.0995291	0.101822	0.100689	0.0952361	0.0951371	0.0938198	0.0968083	0.0991339	0.098451	0.0987124	0.0972482	0.0956502	0.0932887	0.092243	0.0900101	0.0867278	0.0865274	0.0845106	0.0836519	0.0837621	0.080808	0.0764716	0.0732676	0.0746445	0.0751944	0.0741126	0.0712325	0.0699819	0.0699819	0.0709366
14	population SEM	0	0.00227273	0.00489597	0.0161372	0.0259097	0.0324559	0.0422515	0.0478331	0.0500089	0.0573237	0.0598611	0.0674106	0.0761884	0.0761948	0.0755853	0.0779562	0.0809832	0.084276	0.0897611	0.0901277	0.0932077	0.0963718	0.0983699	0.0994409	0.100313	0.0999435	0.100445	0.101392	0.101269	0.10101	0.100451	0.101141	0.100805	0.101921	0.103802	0.104356	0.10455	0.102218	0.105332	0.110526	0.113062
Stim trials cumulative probability of licking
day	cum. time window	0	0.1	0.2	0.3	0.4	0.5	0.6	0.7	0.8	0.9	1	1.1	1.2	1.3	1.4	1.5	1.6	1.7	1.8	1.9	2	2.1	2.2	2.3	2.4	2.5	2.6	2.7	2.8	2.9	3	3.1	3.2	3.3	3.4	3.5	3.6	3.7	3.8	3.9	4
1	population average	0	0.0822893	0.151691	0.204189	0.281037	0.331459	0.366177	0.409459	0.451836	0.482573	0.503463	0.522209	0.54113	0.57387	0.591497	0.605101	0.614855	0.627306	0.644977	0.660026	0.663744	0.675451	0.685234	0.688877	0.698548	0.709052	0.71647	0.73274	0.738193	0.742763	0.747797	0.747797	0.758042	0.759567	0.768078	0.777832	0.780025	0.787012	0.787012	0.794801	0.802664
4	population average	0	0.0915125	0.305829	0.513291	0.591043	0.702597	0.758049	0.778921	0.793438	0.806044	0.816602	0.818721	0.825077	0.839766	0.850184	0.856872	0.865276	0.867359	0.875946	0.888516	0.894837	0.901157	0.905395	0.909597	0.913729	0.917931	0.917931	0.922098	0.926264	0.926264	0.930466	0.93255	0.936716	0.936716	0.938835	0.945085	0.945085	0.947204	0.953489	0.953489	0.957726
14	population average	0	0.00818007	0.0350044	0.20748	0.4267	0.582947	0.652823	0.709805	0.746065	0.76727	0.790068	0.803315	0.815014	0.831786	0.844249	0.86841	0.86841	0.871187	0.873141	0.873141	0.877451	0.877451	0.877451	0.880168	0.880168	0.884479	0.884479	0.884479	0.884479	0.884479	0.884479	0.884479	0.886432	0.891867	0.891867	0.891867	0.891867	0.898894	0.903205	0.903205	0.903205
day	cum. Time window	0	0.1	0.2	0.3	0.4	0.5	0.6	0.7	0.8	0.9	1	1.1	1.2	1.3	1.4	1.5	1.6	1.7	1.8	1.9	2	2.1	2.2	2.3	2.4	2.5	2.6	2.7	2.8	2.9	3	3.1	3.2	3.3	3.4	3.5	3.6	3.7	3.8	3.9	4
1	population SEM	0	0.0208931	0.0392319	0.0460142	0.063752	0.0743346	0.0812503	0.0875575	0.0896363	0.0938891	0.0966	0.0966069	0.0940474	0.0893435	0.0892655	0.0910178	0.0887495	0.0881972	0.084506	0.0841064	0.0834929	0.0804447	0.0806062	0.0810691	0.0822405	0.0785136	0.078009	0.0701652	0.0694008	0.0702459	0.068677	0.068677	0.0630735	0.0635883	0.0615889	0.0601897	0.0589068	0.0566289	0.0566289	0.0548094	0.0520035
4	population SEM	0	0.0160619	0.0560825	0.0885063	0.112546	0.124002	0.124352	0.126178	0.118713	0.107983	0.10022	0.0984709	0.0979444	0.0951762	0.0924614	0.0913829	0.0903429	0.088384	0.088384	0.088373	0.0865921	0.0841966	0.0828782	0.0809704	0.0797643	0.0792423	0.0756812	0.0737443	0.069673	0.0656322	0.0653536	0.0633271	0.0633271	0.0593015	0.0588523	0.0568159	0.0571005	0.0571005	0.0570488	0.0570488	0.0570488
14	population SEM	0	0.00427992	0.015996	0.0810266	0.138211	0.154461	0.156349	0.148884	0.141369	0.132424	0.122392	0.120109	0.114156	0.103205	0.0954394	0.0820698	0.0820698	0.0826437	0.0829954	0.0829954	0.0796311	0.0796311	0.0796311	0.0782493	0.0782493	0.0748976	0.0748976	0.0748976	0.0748976	0.0748976	0.0748976	0.0748976	0.0752942	0.0725774	0.0725774	0.0725774	0.0725774	0.0678246	0.0644107	0.0644107	0.0644107

## Sheet: Figure 1 - Figure Supplement 2B
aROC day4
cum. time window	0	0.1	0.2	0.3	0.4	0.5	0.6	0.7	0.8	0.9	1	1.1	1.2	1.3	1.4	1.5	1.6	1.7	1.8	1.9	2	2.1	2.2	2.3	2.4	2.5	2.6	2.7	2.8	2.9	3	3.1	3.2	3.3	3.4	3.5	3.6	3.7	3.8	3.9	4
population average	0.5	0.52111	0.538971	0.567034	0.60761	0.636389	0.644475	0.653289	0.653032	0.654132	0.657995	0.657247	0.655548	0.657834	0.659481	0.660124	0.660186	0.661218	0.6607	0.660278	0.659931	0.660556	0.659252	0.659919	0.65998	0.659938	0.661806	0.663016	0.66142	0.662498	0.662562	0.663058	0.663058	0.664178	0.664717	0.665341	0.664962	0.664962	0.664651	0.664651	0.662972
population SEM	0	0.00489554	0.00962317	0.0221842	0.0389333	0.0440558	0.0462924	0.046925	0.048346	0.0476395	0.0460784	0.0461397	0.0467282	0.045787	0.0454828	0.0452365	0.0452131	0.0446872	0.0448723	0.0457033	0.046115	0.0458704	0.0469466	0.0466025	0.0464802	0.0463921	0.0455819	0.0451696	0.0457719	0.0452535	0.0452223	0.0448876	0.0448876	0.0442904	0.0441167	0.0438519	0.0440533	0.0440533	0.0442086	0.0442086	0.0449423
dprime day4
cum. time window	0	0.1	0.2	0.3	0.4	0.5	0.6	0.7	0.8	0.9	1	1.1	1.2	1.3	1.4	1.5	1.6	1.7	1.8	1.9	2	2.1	2.2	2.3	2.4	2.5	2.6	2.7	2.8	2.9	3	3.1	3.2	3.3	3.4	3.5	3.6	3.7	3.8	3.9	4
population average	NaN	-0.211512	0.017755	0.310352	0.711357	1.05042	1.20573	1.25273	1.22949	1.17012	1.12991	1.09618	1.04172	1.0669	1.04053	1.03424	0.988781	0.933946	0.867925	0.839522	0.808893	0.768826	0.849251	0.816415	0.77492	0.725353	0.737425	0.767222	0.716371	0.720649	0.695358	0.673475	0.660548	0.591479	0.613915	0.571609	0.568665	0.568665	0.576299	0.560387	0.539656
population SEM	NaN	0.121388	0.160215	0.192844	0.291187	0.357429	0.346644	0.3503	0.32603	0.300472	0.272318	0.259463	0.254299	0.223391	0.210472	0.208219	0.210184	0.210978	0.218037	0.218703	0.215835	0.2009	0.198404	0.191727	0.189073	0.190545	0.178056	0.16841	0.174649	0.170771	0.163257	0.157906	0.152452	0.153682	0.149709	0.152598	0.154145	0.154145	0.156284	0.15104	0.158672
optimal response window
day	1	2	3	4	5	6	7	8	9	10	11	12	13	14
Mouse 1	1.4	0.7	1	3.8	2.5	2.2	1.1	1.4	1.3	1	0.7	0.8	1.6	0.7
Mouse 2	0.5	4	4	3.5	1.9	2.5	0.9	1.9	3.9	1.1	1.5	1	1	1.8
Mouse 3	0.1	0.3	1	0.7	0.6	1.8	0.9	0.7	0.6	0.5	0.9	0.6	0.6	0.7
Mouse 4	0.8	1.1	1	0.6	0.4	0.5	0.3	0.5	0.6	0.5	0.6	1.7	0.6	0.6
Mouse 5	1.5	0.6	0.6	0.5	0.5	0.4	0.4	0.4	0.5	0.3	0.4	1.1	0.5	0.7
Mouse 6	0.8	0.9	0.7	0.8	0.8	1.7	2.3	1.1	2.7	0.5	2.1	2.3	1.2	2
Mouse 7	3.7	0.2	1.8	1.3	0.6	0.9	1.3	0.5	1	1	1.1	1.7	2.6	3.7
Mouse 8	4	2.8	0.5	0.7	0.6	0.9	1	0.5	0.5	0.4	0.4	0.5	0.5	0.4
dprime max
day	1	2	3	4	5	6	7	8	9	10	11	12	13	14
Mouse 1	0.348959	0.399774	0.612408	0.628173	0.927608	1.34639	2.02007	1.91359	1.52799	1.62302	2.68541	2.67916	3.45964	3.4008
Mouse 2	0.165529	0.326898	0.314835	0.329948	0.527451	0.817237	0.317343	0.757863	1.15001	1.96756	2.42562	2.40776	2.13076	3.29325
Mouse 3	0.403748	0.396584	1.04969	1.43433	1.70089	2.01782	2.26776	2.18538	2.03743	2.47688	2.8507	2.52787	3.05646	2.50263
Mouse 4	0.456167	1.21771	2.41986	2.71005	2.51009	2.27856	2.16337	3.17359	2.7718	3.92518	3.5937	3.46209	3.93375	4.2111
Mouse 5	1.52641	1.81446	2.39418	2.1466	2.67671	3.03491	2.66268	3.22645	2.36129	2.12161	3.30421	3.7917	3.02323	3.80441
Mouse 6	0.869871	1.6362	2.64844	1.70143	2.51981	2.79411	1.62944	2.56593	1.77165	0.815567	1.98311	1.46375	2.25325	1.63881
Mouse 7	0.970615	0.145096	0.895588	0.76788	1.61533	2.19445	1.58244	2.38075	1.51984	2.67491	2.28008	2.79546	2.37334	1.90652
Mouse 8	0.222595	0.411828	1.34872	1.95551	1.5823	1.37806	2.40776	2.6466	2.45848	2.65955	1.87729	2.43082	2.94299	3.32403
aROC
day	1	2	3	4	5	6	7	8	9	10	11	12	13	14
Mouse 1	0.507472	0.554717	0.5462	0.573276	0.616086	0.741729	0.780031	0.783019	0.730117	0.740119	0.840089	0.855117	0.93731	0.961701
Mouse 2	0.510911	0.54701	0.509781	0.520889	0.601235	0.653846	0.516789	0.638594	0.709383	0.743566	0.837202	0.738561	0.737898	0.942756
Mouse 3	0.543332	0.540575	0.633489	0.607759	0.582791	0.766578	0.746914	0.770494	0.631718	0.727879	0.920424	0.87378	0.907659	0.825852
Mouse 4	0.544916	0.644162	0.788095	0.861628	0.860587	0.794485	0.890749	0.926202	0.890444	0.966008	0.940623	0.931866	0.97913	0.990074
Mouse 5	0.685406	0.759659	0.816109	0.738757	0.878964	0.866434	0.899371	0.94374	0.855769	0.847467	0.942308	0.975655	0.884411	0.987677
Mouse 6	0.623611	0.725029	0.858919	0.787812	0.853897	0.907424	0.739648	0.883123	0.807203	0.584906	0.819795	0.714743	0.855247	0.715517
Mouse 7	0.64576	0.519153	0.530813	0.515993	0.569304	0.724432	0.731692	0.826178	0.787093	0.852491	0.794402	0.914773	0.885978	0.791304
Mouse 8	0.520695	0.521303	0.585889	0.756483	0.644751	0.638926	0.845988	0.81515	0.784317	0.779236	0.804045	0.788428	0.90582	0.934613
