# Supplementary material for: Learning speed and detection sensitivity controlled by distinct cortico-fugal neurons in visual cortex
Source: eLife. 2020 Dec 7;9:e59247. doi: 10.7554/eLife.59247 (PMC7748414; doi:10.7554/eLife.59247)
Supplement: Figure 1—figure supplement 3—source data 1. — Depth distribution of CT and CSt neurons in VC and overlap of the two-cell populations. [file elife-59247-fig1-figsupp3-data1.xlsx]

## Sheet: Figure 1 Figure Supplemement 3 
Depth Distribution								Colocalization Analysis
Mouse 1		Mouse 2		Mouse 3					CSt	CT	Colocalization
CSt	CT	CSt	CT	CSt	CT			Mouse 1	963	368	67
728.527	663.825	496.736	502.565	715.878	618.996			Mouse 2	734	652	34
703.201	706.619	584.391	559.139	601.438	594.278			Mouse 3	217	253	6
681.874	741.718	613.847	574.651	561.878	590.457			Total	1914	1273	107
744.232	601.373	640.879	570.795	528.565	607.662
592.07	649.961	705.367	627.244	633.41	566.235
609.9	642.178	565.113	607.831	506.459	577.09
570.875	665.644	564.912	621.437	500.444	568.696
661.657	651.978	547.454	637.046	606.505	523.844
730.761	616.855	543.597	578.563	542.286	543.706
644.22	572.054	695.739	623.348	607.868	571.158
616.892	632.534	804.684	650.712	557.343	601.813
618.791	572.16	707.7	580.691	664.385	537.146
618.791	536.978	700.284	592.173	700.136	599.249
619.128	664.528	528.925	619.453	546.214	545.195
272.772	635.609	661.613	555.159	525.335	570.795
313.264	598.216	652.729	573.091	622.476	567.145
587.947	581.122	561.412	650.843	649.686	509.186
562.332	574.8	742.252	606.418	581.731	542.57
550.782	533.86	747.399	586.339	573.216	614.478
516.435	541.649	598.092	636.998	651.912	533.583
523.346	588.664	644.869	623.412	717.539	620.179
552.73	670.225	528.017	602.164	624.977	612.554
612.95	551.277	572.809	598.016	533.514	582.014
755.148	629.207	644.907	674.21	511.387	561.086
688.927	609.853	266.894	633.079	538.591	537.646
564.252	572.72	442.179	587.053	572.951	559.855
529.362	570.905	491.125	617.603	631.097	595.422
194.832	656.462	490.881	654.688	536.071	625.059
657.775	615.548	541.527	699.633	566.364	563.407
587.676	562.954	124.682	658.632	515.436	535.002
506.521	559.068	118.967	611.847	492.158	498.311
568.158	514.699	559.068	576.589	522.73	605.274
609.101	669.482	648.764	567.117	510.417	537.211
636.322	690.875	742.224	605.918	504.409	545.069
700.607	640.221	734.37	631.428	508.102	552.194
685.032	596.094	638.946	611.959	588.273	508.708
648.431	644.837	582.433	633.842	647.698	504.491
613.099	635.071	638.946	641.935	744.815	509.507
611.002	615.988	713.324	678.997	619.399	555.956
579.836	587.153	740.276	640.628	618.819	548.039
533.114	642.842	561.168	603.876	609.252	502.64
181.168	650.899	523.992	574.44	622.554	484.852
188.959	590.273	797.389	609.859	637.417	600.527
224.223	562.981	710.01	641.767	650.961	576.867
546.732	578.537	706.45	667.968	529.801	578.1
740.212	524.224	683	689.777	595.101	573.267
654.549	636.984	686.068	702.81	765.346	539.698
648.802	580.599	649.828	690.36	525.075	569.627
598.064	623.385	600.77	678.784	510.262	548.371
582.443	572.69	561.574	650.96	527.344	544.631
742.183	662.295	540.194	647.134	556.592	539.985
613.624	574.638	698.673	680.54	536.467	551.88
561.016	576.586	552.143	694.252	653.566	550.358
231.803	613.6	526.171	649.714	515.931	521.634
179.22	615.548	553.489	588.303	493.578	499.302
175.324	594.12	531.958	559.543	493.055	506.752
461.662	642.815	563.223	561.168	503.293	529.512
518.24	664.254	549.484	600.217	687.506	593.158
549.329	716.839	573.167	637.198	533.504	608.103
642.815	636.975	631.491	643.352	694.964	593.512
498.684	615.572	493.137	628.694	710.151	589.419
531.166	615.557	619.636	626.887	663.52	588.843
529.893	658.402	584.845	565.224	635.46	590.677
547.371	722.68	537.913	565.402	533.458	595.412
553.266	709.045	584.926	575.469	523.043	601.481
185.309	646.711	501.359	647.406	542.431	587.015
656.497	629.183	540.001	672.979	479.851	532.717
138.358	619.443	536.034	671.582	582.294	543.875
553.554	562.954	567.181	678.888	596.837	544.631
510.806	582.433	652.697	687.538	600.105	524.39
520.33	568.798	493.379	654.091	537.257	552.942
512.675	559.058	261.284	709.023	468.807	562.125
537.8	629.183	551.937	674.244	437.272	541.956
584.585	582.433	638.284	608.617	538.946	531.037
677.979	601.912	513.64	521.411	583.281	506.196
660.694	635.036	546.673	559.231	626.891	469.195
647.286	677.881	543.538	576.382	561.151	478.646
590.337	728.566	596.879	599.157	508.151	471.184
588.325	545.475	550.092	634.946	499.694	512.657
526.459	594.12	542.21	654.996	655.574	514.041
528.495	586.355	513.137	586.74	503.697	549.528
578.744	619.443	487.978	608.255	537.236	540.508
596.879	652.581	532.814	630.322	559.369	558.758
629.328	679.826	568.771	662.438	584.417	534.168
573.021	611.649	603.168	651.114	433.544	484.391
518.28	697.36	633.75	625.087	524.719	547.482
494.961	738.287	669.058	600.321	548.298	616.26
539.702	638.92	711.857	586.403	502.398	580.006
590.427	613.6	567.412	574.014	553.295	535.996
693.924	623.364	553.982	579.978	523.357	551.857
716.966	685.67	509.616	631.215	665.59	556.564
750.113	675.93	495.635	680.919	564.603	544.266
510.594	594.168	687.008	658.554	654.784	545.593
681.818	629.207	575.196	636.742	498.556	635.661
118.839	646.758	594.934	591.919	504.008	597.435
214.281	555.159	585.315	600.985	556.021	638.744
416.856	619.443	552.257	687.836	594.986	627.776
449.975	609.704	544.479	624.908	483.387	619.177
506.464	642.818	517.976	618.499	578.539	627.942
465.554	664.268	482.146	608.433	584.103	636.953
399.325	533.746	453.946	557.396	549.371	625.961
518.148	580.482	652.285	551.827	519.46	577.593
559.055	609.704	631.062	575.281	623.347	673.61
551.263	685.673	692.037	632.26	645.769	655.885
588.277	675.933	554.868	559.77	587.395	605.018
541.527	656.477	701.643	601.054	501.342	585.111
235.699	615.621	603.907	628.99	550.826	542.035
298.039	592.285	516.204	569.281	576.516	637.538
224.02	572.703	500.632	593.504	691.631	572.404
477.242	584.381	658.503	525.164	727.919	657.088
683.722	607.781	613.748	577.221	692.204	704.456
564.898	638.923	584.43	653.299	745.16	577.241
496.725	666.373	566.86	655.071	653.196	634.144
514.252	648.952	541.523	571.074	686.925	672.01
479.19	638.967	582.459	520.391	607.174	624.763
469.454	619.443	621.465	662.366	543.976	607.415
448.027	572.693	697.578	649.232	496.898	694.458
451.923	689.665	128.622	621.904	481.239	653.563
411.054	654.529	206.811	660.358	622.456	644.534
504.516	599.974	467.908	614.042	571.969	582.92
601.912	635.027	439.39	555.162	599.228	586.026
666.193	539.575	495.88	598.127	619.019	555.18
672.037	527.92	517.819	682.052	649.498	546.37
539.589	946.7	519.333	662.707	681.826	659.997
498.669	942.814	540.475	611.9	659.591	600.121
475.294	638.994	545.701	675.888	638.486	654.801
467.502	662.32	542.115	612.312	647.547	641.751
446.092	539.607	589.317	628.564	676.371	591.221
208.437	648.686	693.817	687.51	600.767	547.227
190.907	574.721	699.338	659.222	572.44	567.314
512.308	545.475	674.534	625.891	553.798	607.018
512.308	609.704	676.839	592.919	666.747	605.646
586.329	640.867	657.101	579.16	716.124	578.235
644.763	705.149	632.452	655.731	634.042	602.33
672.046	662.298	609.402	617.956	541.183	643.372
716.86	905.888	718.359	599.952	618.18	584.595
504.547	670.188	690.558	622.569	644.516	554.059
518.152		555.828	616.591	610.712	620.403
473.362		585.548	587.489	542.035	673.109
432.457		550.312	666.398	589.176	500.043
465.554		546.007	524.053	671.543	588.491
502.565		549.992	641.258	676.546	559.79
187.011		169.749	610.941	746.617	667.851
185.063		567.93	575.034	622.07	627.154
658.402		640.228	530.698	134.348	604.834
510.39		676.031	641.719	503.019	539.36
512.319		696.611	620.704	511.548	660.397
553.297		573.339	574.8	686.038	640.226
553.211		684.432	586.219	723.714	582.276
588.277		536.278	624.081	642.462	605.214
712.943		651.027	625.39	107.023	592.738
533.735		633.076	601.354	618.056	568.514
535.683		567.01	563.462	583.429	561.284
430.509		561.219	540.587	695.756	571.103
374.022		512.675	620.631	789.864	608.393
393.5		631.428	608.255	771.051	642.074
481.153		656.497	634.593	655.885	659.174
428.583		592.173	554.56	542.48	556.236
420.77		510.371	650.619	519.04	627.651
490.939		584.702	621.635	555.006	584.595
471.414		596.094	561.341	504.879	632.78
525.998		718.827	633.223	572.311	621.615
539.575		578.537	547.371	628.366	586.097
603.86		599.964	666.193	603.628	571.014
301.954		551.266	689.568	675.249	590.22
311.723		522.048	666.475	480.043	641.937
619.517		533.746	607.781	495.849	578.307
479.19		611.652	720.827	508.575	607.612
633.079		703.204	652.567	490.822	607.37
674.008		691.525	563.166	725.013	689.627
709.045		549.318	693.683	706.883	704.893
603.907		522.048	744.11	627.073	662.104
547.371		609.701	730.472	619.728	681.706
175.324		545.423	685.67	692.226	643.761
237.679		529.839	650.607	705.415	651.549
233.759		564.902	633.076	655.987	551.537
208.428		596.068	681.774	651.674	588.077
500.621		181.168	714.891	590.677	647.627
444.127		749.954	679.826	514.204	658.39
430.707		742.201	656.454	621.717	607.441
487.079		631.155	627.232	681.471	590.512
457.829		537.631	710.995	606.17	599.512
506.461		586.339	707.097	728.358	626.842
568.824		748.044	662.298	740.55	577.445
617.505		732.679	987.692	725.809	550.269
658.41		701.472	701.264	663.404	613.816
693.464		695.543	672.034	511.606	710.055
539.632		627.235	644.763	489.405	702.253
529.836		557.382	615.544	554.137	681.446
496.725		756.36	617.495	704.015	688.136
496.736		753.938	586.326	701.054	643.719
689.568		730.732	594.117	629.946	645.079
761.661		773.741	549.315	625.996	658.123
590.379		799.115	611.652	598.25	646.379
535.68		769.729	601.909	685.506	596.934
449.975		750.015	705.152	707.555	611.225
473.35		725.005	650.607	652.864	603.514
496.721		738.634	642.815	667.336	628.114
451.956		674.458	744.11	626.972	687.224
576.586		695.802	720.756	516.272	693.306
551.266		680.454	701.256	608.958	685.477
633.103		645.119	621.388	686.728	679.145
695.412		635.215	619.44	741.503	679.375
623.336		608.13	636.975	742.803	608.875
596.094		496.908	687.629	736.417	558.037
512.304		504.753	654.506	678.976	629.673
607.831		612.173	631.128	684.306	594.349
136.48		537.853	627.235	567.324	585.312
204.532		228.207	592.169	604.902	608.958
714.891		231.877	691.516	610.174	615.242
674.027		210.601	685.673	526.805	656.874
582.443		206.489	664.243	627.003	689.47
514.267		440.442	633.079	650.436	674.031
444.144		697.629	582.43	610.102	611.205
479.19		660.694	609.704	573.822	638.524
525.943		635.131	712.941	611.474	668.422
580.495		610.077	654.506	598.438	611.253
601.988		650.899	588.277	665.975	625.773
		571.074	656.454	591.732	656.801
		724.652	689.568	571.103	538.418
		677.889	672.034	686.905	573.544
		668.278	720.732	579.999	583.896
		619.468	687.717	673.87	548.789
		656.454	640.879	687.973	569.613
		726.579	619.468	626.918	681.471
		623.336	592.173	519.07	597.261
		701.256	650.619	470.785	563.141
		685.67	687.629	468.172	654.119
		654.503	640.941	465.702	634.612
		636.975	697.401	138.066	583.894
		607.753	701.256	169.076	626.808
		549.318	726.587	252.368	591.702
		541.523	714.889	351.177	540.98
		522.044	712.943	267.892	656.718
		541.537	670.089	300.403	599.499
		635.027	746.066	453.897	574.791
		707.1	699.403	420.058	626.81
		757.746	633.076	511.072	522.775
		666.191	652.581	505.895	639.813
		726.587		658.101	671.034
		613.6		628.157	639.834
		576.589		658.02	574.791
		568.794		632.044	585.196
		541.523		655.43	632.011
		559.058		543.582	574.791
		646.711		504.569	658.019
		720.732		463.071	615.117
		685.739		551.408	572.19
		660.347		529.278	596.898
		561.006		500.668	598.205
		638.92		475.958	590.488
		615.548		481.162	616.542
		662.295		459.053	600.805
		674.027		492.864	616.427
		609.704		514.971	577.415
		720.735		526.675	652.817
		672.034		530.576	648.916
		584.391		501.969	625.509
		578.537		487.664	615.105
		685.673		453.851	553.99
		705.149		468.172	616.405
		843.454		535.78	642.419
		749.954		590.409	615.139
		687.618		624.229	633.332
		699.308		501.969	642.425
		549.315		609.925	615.11
		523.992		530.583	621.607
		652.567		544.883	596.898
		718.784		504.568	525.376
		703.201		325.119	630.711
		679.829		265.291	572.192
		642.818		323.81	632.01
		582.433		218.477	603.423
		547.367		533.192	628.121
		465.554		560.492	622.941
		494.777		620.312	559.21
		475.33		661.92	573.497
		259.081		677.527	570.891
		235.707		647.617	660.652
		192.854		638.512	617.718
		707.097		537.093	615.106
		562.954		508.476	611.205
		496.721		468.156	603.406
		592.169		418.739	574.793
		564.902		472.057	564.401
		559.058		435.653	568.295
		650.61		498.081
		726.587		465.555
		638.92		433.046
		619.443		420.04
		588.277		414.84
		566.85		312.104
		457.762		153.451
		810.374		162.559
		757.746		461.653
		753.847		654.117
		720.732		611.205
		705.152
		679.826
		619.44
		588.277
		561.003
		520.1
		613.6
		578.537
		598.016
		520.1
		662.298
		629.18
		586.329
		584.381
		508.412
		492.829
		416.856
		449.988
		553.214
		596.068
		599.964
		642.818
		685.673
		726.587
		578.537
		557.107
		759.731
		233.759
		557.11
		623.339
		714.891
		551.266
		603.885
		520.111
		549.318
		541.523
		592.169
		664.243
		703.225
		307.772
		192.854
		192.854
		603.97
		683.722
		712.941
		775.284
		734.368
		687.629
		619.44
		578.537
		553.214
		559.058
		590.25
		605.805
		533.732
		545.419
		905.794
		564.902
		611.652
		570.742
		607.756
		726.576
		644.79
