# Supplementary material for: Learning speed and detection sensitivity controlled by distinct cortico-fugal neurons in visual cortex
Source: eLife. 2020 Dec 7;9:e59247. doi: 10.7554/eLife.59247 (PMC7748414; doi:10.7554/eLife.59247)
Supplement: Figure 1—figure supplement 5—source data 1. [file elife-59247-fig1-figsupp5-data1.xlsx]

## Sheet: Figure 1 - Figure Supplement 5
	CT ablation			CSt ablation
	mean feret diameter			mean feret diameter
Mouse 1	1646.42		Mouse 1	1808.74
Mouse 2	1427.3		Mouse 2	1670.97
Mouse 3	1894.84		Mouse 3	1843.27
Mouse 4	1246.29		Mouse 4	1374.67
Mouse 5	1569.71		Mouse 5	1887.05
			Mouse 6	1692.65
			Mouse 7	1923.38
			Mouse 8	1647.09
mean	1556.91		mean	1730.98
SD	242.722		SD	176.917
SEM	108.548		SEM	62.5495
