# Supplementary material for: Learning speed and detection sensitivity controlled by distinct cortico-fugal neurons in visual cortex
Source: eLife. 2020 Dec 7;9:e59247. doi: 10.7554/eLife.59247 (PMC7748414; doi:10.7554/eLife.59247)
Supplement: Figure 1—figure supplement 6—source data 1. [file elife-59247-fig1-figsupp6-data1.xlsx]

## Sheet: Figure 1 - Figure Supplement 6
retroAAV-Cre only
aROC
Day	1	2	3	4	5	6	7	8	9	10	11	12	13	14
population mean	0.551108	0.626027	0.676561	0.683705	0.689059	0.728632	0.714646	0.781141	0.795434	0.811649	0.81596	0.866905	0.830268	0.840937
population SEM	0.00833322	0.0347247	0.0478989	0.0522173	0.0556234	0.0577083	0.0618043	0.0446924	0.047735	0.04857	0.0441826	0.0269674	0.0376098	0.0429866
FL Latency
Day	1	2	3	4	5	6	7	8	9	10	11	12	13	14
Stimulus Trials
population mean	1.05775	0.863513	0.758629	0.753366	0.563	0.69681	0.62257	0.584324	0.604443	0.663809	0.62359	0.558635	0.636434	0.507594
population SEM	0.150133	0.158214	0.165135	0.159117	0.102637	0.209457	0.114724	0.146366	0.154621	0.14365	0.099083	0.0998881	0.104453	0.0919323
Blank Trials
population mean	1.04223	0.984581	1.10586	1.20434	0.957916	1.11983	1.06195	1.3138	1.28767	1.38146	1.30472	1.54559	1.52861	1.43286
population SEM	0.147552	0.102809	0.178646	0.140031	0.0493353	0.0899026	0.109109	0.136472	0.158701	0.183157	0.131728	0.176328	0.275486	0.167905
FL variability
Day	1	2	3	4	5	6	7	8	9	10	11	12	13	14
Stimulus Trials
population mean	0.604506	0.851043	0.594277	0.701989	0.612947	0.356153	0.320545	0.313973	0.241191	0.27234	0.287846	0.197826	0.165757	0.128333
population SEM	0.0673711	0.0768674	0.0888015	0.0925161	0.160813	0.12215	0.070255	0.11277	0.0836897	0.104175	0.0887336	0.0520469	0.0596629	0.0439925
Blank Trials
population mean	0.710717	0.557952	0.612753	0.699056	0.765059	0.772559	0.68611	0.691044	0.650205	0.574738	0.676055	0.675227	0.572435	0.688598
population SEM	0.0798263	0.0871084	0.0720469	0.0728812	0.0759179	0.0886781	0.0657537	0.0544322	0.0473472	0.0689799	0.0805147	0.0796523	0.103495	0.0840671
