# Supplementary material for: Learning speed and detection sensitivity controlled by distinct cortico-fugal neurons in visual cortex
Source: eLife. 2020 Dec 7;9:e59247. doi: 10.7554/eLife.59247 (PMC7748414; doi:10.7554/eLife.59247)
Supplement: Figure 1—source data 1. [file elife-59247-fig1-data1.xlsx]

## Sheet:  Figure 1B
Example animal
day1
aROC = 0.52	cum. time window	0	0.1	0.2	0.3	0.4	0.5	0.6	0.7	0.8	0.9	1	1.1	1.2	1.3	1.4	1.5	1.6	1.7	1.8	1.9	2	2.1	2.2	2.3	2.4	2.5	2.6	2.7	2.8	2.9	3	3.1	3.2	3.3	3.4	3.5	3.6	3.7	3.8	3.9	4
cum. probability lick (blank)	FA	0	0.0909091	0.227273	0.30303	0.363636	0.439394	0.469697	0.545455	0.560606	0.606061	0.621212	0.636364	0.666667	0.681818	0.712121	0.757576	0.772727	0.80303	0.818182	0.818182	0.833333	0.833333	0.863636	0.863636	0.863636	0.863636	0.863636	0.863636	0.863636	0.878788	0.893939	0.893939	0.893939	0.893939	0.909091	0.924242	0.924242	0.924242	0.924242	0.924242	0.924242
cum. probability lick (stim)	Hit	0	0.109756	0.219512	0.243902	0.280488	0.329268	0.378049	0.439024	0.487805	0.52439	0.585366	0.621951	0.682927	0.731707	0.768293	0.780488	0.780488	0.792683	0.817073	0.829268	0.841463	0.841463	0.853659	0.865854	0.890244	0.890244	0.890244	0.890244	0.902439	0.902439	0.902439	0.902439	0.902439	0.914634	0.926829	0.926829	0.926829	0.926829	0.926829	0.939024	0.95122
	time bin	0	0.1	0.2	0.3	0.4	0.5	0.6	0.7	0.8	0.9	1	1.1	1.2	1.3	1.4	1.5	1.6	1.7	1.8	1.9	2	2.1	2.2	2.3	2.4	2.5	2.6	2.7	2.8	2.9	3	3.1	3.2	3.3	3.4	3.5	3.6	3.7	3.8	3.9	4			4.1
proportion of trials (blank)	FA	0.0454545	0.106061	0.136364	0.0606061	0.0151515	0.0909091	0.030303	0.0757576	0.030303	0.030303	0.0151515	0.0151515	0.030303	0.0151515	0.030303	0.0454545	0.0151515	0.030303	0	0.0151515	0	0.0151515	0.0151515	0	0	0	0	0	0	0.030303	0	0	0	0.0151515	0.0151515	0	0	0	0	0	0		CR	0.0757576
proportion of trials (stim)	Hit	0.0609756	0.109756	0.0609756	0.0365854	0.0243902	0.0853659	0.0243902	0.0731707	0.0365854	0.0243902	0.0609756	0.0609756	0.0487805	0.0487805	0.0243902	0	0	0.0365854	0	0.0243902	0	0.0121951	0.0121951	0.0121951	0.0121951	0	0	0.0121951	0	0	0	0	0.0121951	0.0121951	0	0	0	0	0	0.0243902	0		Miss	0.0487805
day5
aROC = 0.64	time bin	0	0.1	0.2	0.3	0.4	0.5	0.6	0.7	0.8	0.9	1	1.1	1.2	1.3	1.4	1.5	1.6	1.7	1.8	1.9	2	2.1	2.2	2.3	2.4	2.5	2.6	2.7	2.8	2.9	3	3.1	3.2	3.3	3.4	3.5	3.6	3.7	3.8	3.9	4
cum. probability lick (blank)	FA	0	0.230769	0.365385	0.442308	0.519231	0.615385	0.634615	0.673077	0.711538	0.75	0.788462	0.788462	0.826923	0.865385	0.865385	0.884615	0.884615	0.903846	0.961538	0.961538	0.961538	0.961538	0.961538	0.961538	0.961538	0.961538	0.961538	0.961538	0.961538	0.961538	0.980769	0.980769	0.980769	0.980769	0.980769	0.980769	0.980769	0.980769	0.980769	0.980769	0.980769
cum. probability lick (stim)	Hit	0	0.121622	0.432432	0.878378	0.932432	0.959459	0.972973	0.972973	0.972973	0.972973	0.972973	0.972973	0.972973	0.972973	0.972973	0.972973	0.972973	0.972973	0.986486	0.986486	0.986486	0.986486	0.986486	0.986486	0.986486	0.986486	0.986486	0.986486	0.986486	0.986486	0.986486	0.986486	0.986486	0.986486	0.986486	0.986486	0.986486	0.986486	0.986486	0.986486	0.986486
	cum. time window	0	0.1	0.2	0.3	0.4	0.5	0.6	0.7	0.8	0.9	1	1.1	1.2	1.3	1.4	1.5	1.6	1.7	1.8	1.9	2	2.1	2.2	2.3	2.4	2.5	2.6	2.7	2.8	2.9	3	3.1	3.2	3.3	3.4	3.5	3.6	3.7	3.8	3.9	4			4.1
proportion of trials (blank)	FA	0.0454545	0.106061	0.136364	0.0606061	0.0151515	0.0909091	0.030303	0.0757576	0.030303	0.030303	0.0151515	0.0151515	0.030303	0.0151515	0.030303	0.0454545	0.0151515	0.030303	0	0.0151515	0	0.0151515	0.0151515	0	0	0	0	0	0	0.030303	0	0	0	0.0151515	0.0151515	0	0	0	0	0	0		CR	0.0757576
proportion of trials (stim)	Hit	0.0609756	0.109756	0.0609756	0.0365854	0.0243902	0.0853659	0.0243902	0.0731707	0.0365854	0.0243902	0.0609756	0.0609756	0.0487805	0.0487805	0.0243902	0	0	0.0365854	0	0.0243902	0	0.0121951	0.0121951	0.0121951	0.0121951	0	0	0.0121951	0	0	0	0	0.0121951	0.0121951	0	0	0	0	0	0.0243902	0		Miss	0.0487805
day14
aROC = 0.92	cum. time window	0	0.1	0.2	0.3	0.4	0.5	0.6	0.7	0.8	0.9	1	1.1	1.2	1.3	1.4	1.5	1.6	1.7	1.8	1.9	2	2.1	2.2	2.3	2.4	2.5	2.6	2.7	2.8	2.9	3	3.1	3.2	3.3	3.4	3.5	3.6	3.7	3.8	3.9	4
cum. probability lick (blank)	FA	0	0	0	0.0754717	0.113208	0.169811	0.226415	0.283019	0.283019	0.377358	0.377358	0.471698	0.509434	0.528302	0.528302	0.54717	0.566038	0.603774	0.641509	0.679245	0.698113	0.716981	0.716981	0.716981	0.735849	0.754717	0.754717	0.754717	0.754717	0.773585	0.773585	0.773585	0.773585	0.773585	0.773585	0.792453	0.792453	0.792453	0.811321	0.849057	0.867925
cum. probability lick (stim)	Hit	0	0.0172414	0.0689655	0.62069	0.982759	1	1	1	1	1	1	1	1	1	1	1	1	1	1	1	1	1	1	1	1	1	1	1	1	1	1	1	1	1	1	1	1	1	1	1	1
	time bin	0	0.1	0.2	0.3	0.4	0.5	0.6	0.7	0.8	0.9	1	1.1	1.2	1.3	1.4	1.5	1.6	1.7	1.8	1.9	2	2.1	2.2	2.3	2.4	2.5	2.6	2.7	2.8	2.9	3	3.1	3.2	3.3	3.4	3.5	3.6	3.7	3.8	3.9	4			4.1
proportion of trials (blank)	FA	0	0	0.0566038	0.0377358	0.0377358	0.0566038	0.0754717	0.0188679	0.0943396	0	0.0188679	0.0943396	0.0377358	0	0	0.0377358	0	0.0566038	0.0377358	0.0188679	0.0188679	0.0188679	0	0.0188679	0.0188679	0	0	0	0	0.0188679	0	0	0	0	0	0.0188679	0	0	0.0377358	0.0188679	0.0188679		CR	0.132075
proportion of trials (stim)	Hit	0	0.0517241	0.172414	0.724138	0.0517241	0	0	0	0	0	0	0	0	0	0	0	0	0	0	0	0	0	0	0	0	0	0	0	0	0	0	0	0	0	0	0	0	0	0	0	0		Miss	0

## Sheet: Figure 1C
Intact
aROC
Day	1	2	3	4	5	6	7	8	9	10	11	12	13	14
population mean	0.559446	0.563383	0.594571	0.601149	0.617138	0.697165	0.71318	0.760836	0.724955	0.760248	0.803544	0.844485	0.866543	0.861497
population SEM	0.0238218	0.0285437	0.0343312	0.0338161	0.0404001	0.0337098	0.0499759	0.0384041	0.0303513	0.0220308	0.0407505	0.0291	0.0291767	0.0393867
FL Latency
Day	1	2	3	4	5	6	7	8	9	10	11	12	13	14
Stimulus Trials
population mean	1.33746	1.166	0.794698	0.766469	0.687471	0.790427	0.602599	0.524929	0.648052	0.508424	0.486917	0.429532	0.467053	0.517692
population SEM	0.184847	0.238204	0.205465	0.197313	0.201606	0.234146	0.182216	0.163074	0.19028	0.0927089	0.081419	0.0524308	0.0788281	0.128199
Blank Trials
population mean	1.41813	1.13113	0.996553	1.01243	1.02618	1.1862	1.25625	1.19983	1.16613	1.28615	1.33646	1.49802	1.64284	1.4878
population SEM	0.157678	0.160715	0.171025	0.161093	0.193788	0.164497	0.123921	0.114213	0.0994914	0.0839664	0.154473	0.15776	0.15379	0.19062
FL variability
Day	1	2	3	4	5	6	7	8	9	10	11	12	13	14
Stimulus Trials
population mean	0.745084	0.714424	0.490378	0.484788	0.433097	0.396777	0.39298	0.343313	0.43149	0.292478	0.190331	0.109489	0.0790053	0.12047
population SEM	0.0686101	0.100636	0.114782	0.121373	0.121105	0.0759139	0.0935278	0.132398	0.113874	0.0909747	0.0772648	0.0303174	0.0259222	0.0499107
Blank Trials
population mean	0.83476	0.670949	0.67419	0.8001	0.727699	0.777021	0.86435	0.785316	0.806173	0.790258	0.780041	0.785195	0.758869	0.774449
population SEM	0.0663335	0.0548475	0.0822562	0.0636195	0.0578009	0.0419008	0.0526527	0.0326783	0.0773738	0.0348693	0.0369199	0.0690563	0.0501068	0.0628536

## Sheet: Figure 1D
CT ablation
aROC
Day	1	2	3	4	5	6	7	8	9	10	11	12	13	14
population mean	0.553978	0.607382	0.64112	0.665649	0.625375	0.755966	0.723024	0.795692	0.811089	0.810033	0.817188	0.801785	0.856002	0.854564
population SEM	0.0281153	0.0364002	0.0256869	0.0512258	0.030984	0.0509809	0.0559841	0.0762555	0.0606056	0.0659706	0.0648377	0.0738167	0.0560085	0.0802499
FL Latency
Day	1	2	3	4	5	6	7	8	9	10	11	12	13	14
Stimulus Trials
population mean	1.01826	0.971983	0.667031	0.734718	0.626463	0.582095	0.488532	0.623984	0.715023	0.690495	0.703452	0.705979	0.610616	0.591105
population SEM	0.138248	0.183993	0.213491	0.256546	0.22365	0.24642	0.153868	0.236165	0.16513	0.161949	0.181143	0.176467	0.0968794	0.101037
Blank Trials
population mean	1.18311	1.455	1.03962	1.12176	0.875179	1.36975	1.1711	1.45146	1.6793	1.81368	1.70062	1.7081	1.55281	1.55663
population SEM	0.199891	0.202454	0.177116	0.1517	0.143541	0.101284	0.091541	0.142099	0.107573	0.171552	0.167171	0.17493	0.1064	0.257822
FL variability
Day	1	2	3	4	5	6	7	8	9	10	11	12	13	14
Stimulus Trials
population mean	0.810557	0.737206	0.526536	0.473057	0.414646	0.330293	0.536042	0.418419	0.482063	0.348136	0.46059	0.381461	0.310962	0.241719
population SEM	0.0609236	0.0940112	0.144524	0.17441	0.161092	0.173846	0.11636	0.175035	0.114567	0.0632331	0.151388	0.126026	0.128639	0.141433
Blank Trials
population mean	0.710532	0.834836	0.771796	0.839454	0.79264	0.865565	0.969149	0.889272	0.826428	0.74312	0.687898	0.823465	0.828069	0.646275
population SEM	0.0530715	0.0571083	0.135604	0.0533284	0.165881	0.0529274	0.0505543	0.0365021	0.0756292	0.0544261	0.125111	0.0329139	0.0455412	0.0854205

## Sheet: Figure 1E
CSt-ablation
aROC
Day	1	2	3	4	5	6	7	8	9	10	11	12	13	14
population mean	0.550083	0.532584	0.559594	0.566284	0.597357	0.585799	0.65769	0.654007	0.609712	0.615259	0.63483	0.677532	0.658665	0.679932
population SEM	0.00935033	0.00563726	0.0101897	0.0196672	0.0212933	0.0263515	0.0466256	0.0463733	0.0295159	0.036019	0.0365652	0.036182	0.0483235	0.0397252
FL Latency
Day	1	2	3	4	5	6	7	8	9	10	11	12	13	14
Stimulus Trials
population mean	1.59204	1.34852	1.26776	1.35679	1.03413	1.08324	0.945981	1.03384	1.12708	1.11534	1.13669	1.02468	1.17596	1.11214
population SEM	0.136343	0.124987	0.164038	0.180643	0.154907	0.157958	0.153633	0.192841	0.179586	0.140633	0.129072	0.139352	0.151578	0.145056
Blank Trials
population mean	1.35302	1.33428	1.3452	1.39525	1.14891	1.25601	1.47147	1.46139	1.33537	1.39773	1.61717	1.44436	1.70822	1.54664
population SEM	0.0753973	0.134248	0.172512	0.125422	0.102557	0.123126	0.147125	0.12022	0.0971441	0.111593	0.10581	0.0982355	0.126996	0.104597
FL variability
Day	1	2	3	4	5	6	7	8	9	10	11	12	13	14
Stimulus Trials
population mean	0.7201	0.769629	0.753914	0.710106	0.612354	0.708217	0.654492	0.568881	0.500312	0.52389	0.617215	0.527863	0.553048	0.495415
population SEM	0.0368412	0.0258515	0.0339339	0.0613232	0.0595646	0.0394104	0.135304	0.104896	0.0797306	0.0832449	0.0770966	0.055752	0.0578146	0.0738312
Blank Trials
population mean	0.824948	0.87073	0.694486	0.755261	0.890366	0.751825	0.786445	0.828644	0.757821	0.778957	0.708272	0.789357	0.721548	0.740732
population SEM	0.0445594	0.0480719	0.0452751	0.0709563	0.0893484	0.0362144	0.125164	0.0565131	0.0464957	0.0671049	0.0514645	0.0658487	0.0444482	0.0472494
