# Supplementary material for: Learning speed and detection sensitivity controlled by distinct cortico-fugal neurons in visual cortex
Source: eLife. 2020 Dec 7;9:e59247. doi: 10.7554/eLife.59247 (PMC7748414; doi:10.7554/eLife.59247)
Supplement: Figure 2—figure supplement 1—source data 1. [file elife-59247-fig2-figsupp1-data1.xlsx]

## Sheet: Figure 2 - Figure Supplement 1
	VC lesion
	mean feret diameter
Mouse 1	2865.95
Mouse 2	2985.51
Mouse 3	3936.16
Mouse 4	2695.61
Mouse 5	2537.29
Mouse 6	2823.31
Mouse 7	2244.56
Mouse 8	2912.08
mean	2875.06
SD	459.086
SEM	162.312
