# Supplementary material for: Learning speed and detection sensitivity controlled by distinct cortico-fugal neurons in visual cortex
Source: eLife. 2020 Dec 7;9:e59247. doi: 10.7554/eLife.59247 (PMC7748414; doi:10.7554/eLife.59247)
Supplement: Figure 2—source data 1. [file elife-59247-fig2-data1.xlsx]

## Sheet: Figure 2C
VC lesion
aROC
Day	1	2	3	4	5	6	7	8	9	10	11	12	13	14
population mean	0.571533	0.564159	0.586248	0.600208	0.65128	0.582337	0.600405	0.689098	0.62525	0.629124	0.652603	0.660855	0.676937	0.604653
population SEM	0.0190807	0.0261655	0.0410887	0.0395139	0.0395978	0.0479855	0.0433468	0.0632778	0.0598144	0.0564596	0.0601561	0.0527218	0.0557658	0.0265293
FL Latency
Day	1	2	3	4	5	6	7	8	9	10	11	12	13	14
Stimulus Trials
population mean	1.24106	1.3094	1.24448	1.39423	0.951	1.29249	1.29342	1.00124	1.21845	1.18767	1.08042	1.15246	1.01835	1.2003
population SEM	0.14626	0.211183	0.225749	0.227479	0.178115	0.109446	0.209936	0.176541	0.169007	0.167309	0.211945	0.162035	0.176986	0.184298
Blank Trials
population mean	1.13451	1.31714	1.43301	1.55779	1.29651	1.74518	1.438	1.60956	1.4154	1.52671	1.57059	1.50431	1.35152	1.58938
population SEM	0.128842	0.115265	0.153511	0.108521	0.13012	0.0916153	0.207054	0.164071	0.0712809	0.148022	0.206358	0.166999	0.140474	0.236328
FL variability
Day	1	2	3	4	5	6	7	8	9	10	11	12	13	14
Stimulus Trials
population mean	0.810715	0.665572	0.582064	0.621174	0.633493	0.706488	0.68456	0.464487	0.503578	0.585844	0.432104	0.477682	0.430647	0.524737
population SEM	0.0437753	0.0722854	0.095464	0.101806	0.116	0.100875	0.0828947	0.117281	0.0813238	0.0912507	0.0904222	0.103964	0.0928053	0.0985088
Blank Trials
population mean	0.761185	0.89027	0.732708	0.796295	0.6754	0.817671	0.708273	0.721664	0.857588	0.689225	0.68368	0.73102	0.725721	0.633588
population SEM	0.0458489	0.0500062	0.0313907	0.031205	0.0352818	0.0673155	0.0729496	0.0484579	0.0469296	0.0799671	0.0711875	0.0971606	0.124206	0.0811704

## Sheet: Figure 2D
aroc/day (day 1 to day 14)
	intact	retroCre	CT-ablation	CSt-ablation	VC lesion
population mean	0.0277	0.0299	0.0296	0.014	0.0139
population SEM	0.0028	0.0042	0.0059	0.0032	0.0042
Wilcoxon signed-rank test	pvalue
intact vs. VC Lesion	0.0207
intact vs. retroCre	0.743
retroCre vs. CT-ablation	0.7972
retroCre vs. CSt-ablation	0.0151
spontaneous ILI
intact	day	1	2	3	4	5	6	7	8	9	10	11	12	13	14
	population mean	1.01214	0.996541	1.0376	1.1308	1.2316	1.39292	1.22608	1.33119	1.31605	1.42827	1.57899	1.49014	1.43954	1.51873
	population SEM	0.133978	0.0706023	0.0912248	0.0541724	0.0945213	0.0866814	0.083909	0.12424	0.0814335	0.0660388	0.0991477	0.0796871	0.0563532	0.185909
retroCre
	population mean	0.867793	1.04567	1.18131	1.0758	1.01476	1.27499	1.29164	1.40335	1.31547	1.45926	1.40409	1.48902	1.33012	1.63512
	population SEM	0.0615968	0.0942003	0.0962899	0.0793445	0.0782505	0.0932273	0.148482	0.0767623	0.108035	0.112781	0.0851835	0.149135	0.170702	0.151077
CT-ablation
	population mean	0.785605	1.18617	0.982799	1.1134	1.15369	1.35753	1.28295	1.51609	1.42537	1.45497	1.58781	1.78117	1.5347	1.51597
	population SEM	0.0816502	0.192354	0.0553911	0.0981763	0.0827813	0.0910621	0.176073	0.129119	0.146341	0.133142	0.157672	0.300701	0.184357	0.146454
CSt-ablation
	population mean	0.922624	1.04696	1.1944	1.31387	1.1092	1.51613	1.77133	1.52476	1.45114	1.6271	1.55493	1.64171	1.46307	1.52948
	population SEM	0.058677	0.0414087	0.0835855	0.123088	0.103376	0.160554	0.201194	0.186968	0.144991	0.113955	0.157473	0.134068	0.152057	0.114826
VC lesion
	population mean	0.991891	1.07229	1.24121	1.36252	1.46485	1.51851	1.3579	1.74438	1.67315	1.68399	1.68357	1.56143	1.72977	1.68017
	population SEM	0.058222	0.0565785	0.113114	0.134533	0.111384	0.102004	0.0918348	0.180223	0.180463	0.19068	0.201002	0.151825	0.376531	0.19362
trials per day
intact	day	1	2	3	4	5	6	7	8	9	10	11	12	13	14
	population mean	240.625	244.25	242.375	242.375	247.25	246.875	241.75	248	240.5	246.875	248	247.5	244.5	231
	population SEM	5.46723	5.04887	5.93397	5.65981	1.22109	0.692756	6.40522	0.597614	4.326	1.04262	0.5	0.755929	2.82843	17.72
retroCre
	population mean	213.111	178.556	222.111	198.444	228.222	248.111	245.889	242.222	244.778	246.889	245.556	247.778	249.111	248.111
	population SEM	6.9311	15.218	8.00945	12.635	8.50127	0.734931	1.68691	4.43402	3.68472	0.351364	2.43876	0.93953	0.423099	0.696109
CT-ablation
	population mean	203.8	183.8	199.4	200	199.4	248	248.4	246.4	248	246.4	247	246	247.2	244.4
	population SEM	3.86523	24.461	1.69115	1.64317	1.28841	0.316228	0.678233	0.87178	0.632456	0.979796	0.707107	1.51658	0.8	2.20454
CSt-ablation
	population mean	225.875	229.875	237	234.625	211.375	246	245.75	238.25	246.75	246.875	243.5	248.375	240.875	240.625
	population SEM	8.7616	8.83265	8.20496	8.01101	24.0542	0.963624	2.19374	5.99032	1.03078	1.21652	2.28348	0.625	6.31166	4.57063
VC lesion
	population mean	240	240.75	243.625	239.375	241.75	215.25	239.875	245.625	241.75	247.75	246.125	244.25	242.375	224.75
	population SEM	5.50973	5.46008	4.82159	5.97894	6.43026	29.1411	6.26338	1.08459	2.94443	1.23563	0.989904	1.52069	3.46893	16.9134
