# Supplementary material for: Learning speed and detection sensitivity controlled by distinct cortico-fugal neurons in visual cortex
Source: eLife. 2020 Dec 7;9:e59247. doi: 10.7554/eLife.59247 (PMC7748414; doi:10.7554/eLife.59247)
Supplement: Figure 3—source data 1. [file elife-59247-fig3-data1.xlsx]

## Sheet: Figure 3A
intact										CT ablation
	Day										Day
aROC	14	15	16	17	18	19	20	21		aROC	14	15	16	17	18	19	20	21
population mean	0.861497	0.867092	0.867443	0.844063	0.860744	0.90587	0.871023	0.842793		population mean	0.854564	0.855832	0.866151	0.905651	0.907274	0.932186	0.905972	0.914454
population SEM	0.0393867	0.0339801	0.0423642	0.0567791	0.0254447	0.0232499	0.0382177	0.0303021		population SEM	0.0802499	0.070951	0.0490634	0.0464835	0.0530884	0.0454148	0.0480096	0.0303952
FL Latency	Day									FL Latency	Day
Stimulus Trials	14	15	16	17	18	19	20	21		Stimulus Trials	14	15	16	17	18	19	20	21
population mean	0.517692	0.527764	0.464738	0.517319	0.521696	0.43304	0.413122	0.478393		population mean	0.591105	0.51056	0.433132	0.509775	0.42253	0.370725	0.514394	0.41368
population SEM	0.128199	0.0906518	0.0645589	0.101099	0.099546	0.0577743	0.0570439	0.0610588		population SEM	0.101037	0.089506	0.07705	0.0973054	0.0400989	0.0383728	0.0935919	0.0557655
Blank Trials										Blank Trials
population mean	1.4878	1.65577	1.59966	1.34632	1.58618	1.59508	1.69222	1.4469		population mean	1.55663	1.5067	1.56615	1.7287	1.80177	1.83098	1.6717	1.78382
population SEM	0.19062	0.140008	0.160335	0.220474	0.104345	0.0596538	0.175834	0.114874		population SEM	0.257822	0.257317	0.0971483	0.181231	0.231452	0.224533	0.248767	0.136775
FL variability	Day									FL variability	Day
Stimulus Trials	14	15	16	17	18	19	20	21		Stimulus Trials	14	15	16	17	18	19	20	21
population mean	0.12047	0.113932	0.144226	0.260213	0.184087	0.0390513	0.103438	0.136773		population mean	0.241719	0.116694	0.17601	0.136273	0.0834072	0.0491485	0.0426788	0.0408335
population SEM	0.0499107	0.0394708	0.0534532	0.103205	0.0747918	0.00881481	0.0452074	0.0448185		population SEM	0.141433	0.0354567	0.0929498	0.0791341	0.0440435	0.0159751	0.00722003	0.0162992
Blank Trials										Blank Trials
population mean	0.774449	0.663084	0.734044	0.629314	0.894561	0.771241	0.814232	0.892763		population mean	0.646275	0.663564	0.780069	0.827111	0.710373	0.615138	0.918463	0.862204
population SEM	0.0628536	0.0654442	0.0633018	0.121457	0.0451933	0.0387872	0.0887421	0.0519339		population SEM	0.0854205	0.0506106	0.0596071	0.132293	0.101019	0.0569588	0.0419403	0.0805458

## Sheet: Figure 3B
VC lesion										CSt ablation
	Day										Day
aROC	14	15	16	17	18	19	20	21		aROC	14	15	16	17	18	19	20	21
population mean	0.604653	0.691513	0.698573	0.689389	0.756085	0.763801	0.78694	0.762587		population mean	0.679932	0.652731	0.696975	0.721949	0.740314	0.770852	0.894019	0.869711
population SEM	0.0265293	0.0561752	0.0561655	0.0619823	0.0475038	0.0523578	0.0659585	0.0483965		population SEM	0.0397252	0.0413517	0.0373334	0.042648	0.0465153	0.0518651	0.01287	0.0152842
FL Latency	Day									FL Latency	Day
Stimulus Trials	14	15	16	17	18	19	20	21		Stimulus Trials	14	15	16	17	18	19	20	21
population mean	1.2003	1.1033	1.13901	1.13924	1.07957	1.04133	0.874916	0.914104		population mean	1.11214	1.17747	0.934918	0.794155	1.03404	0.934101	0.635554	0.630986
population SEM	0.184298	0.184864	0.206062	0.226915	0.204481	0.229628	0.187259	0.138648		population SEM	0.145056	0.192961	0.152395	0.120331	0.166824	0.144637	0.060094	0.0110485
Blank Trials										Blank Trials
population mean	1.58938	1.48815	1.34943	1.70465	1.70728	1.66093	1.54843	1.61927		population mean	1.54664	1.49893	1.47897	1.49188	1.58478	1.81379	1.8032	1.92037
population SEM	0.236328	0.129508	0.158062	0.306917	0.132637	0.101267	0.167204	0.107126		population SEM	0.104597	0.0901218	0.084473	0.067598	0.120494	0.120323	0.0794064	0.0786081
FL variability	Day									FL variability	Day
Stimulus Trials	14	15	16	17	18	19	20	21		Stimulus Trials	14	15	16	17	18	19	20	21
population mean	0.524737	0.388019	0.357534	0.393916	0.363627	0.392255	0.303332	0.399757		population mean	0.495415	0.498144	0.415988	0.377627	0.407952	0.231723	0.0952974	0.125951
population SEM	0.0985088	0.0887319	0.0923055	0.118014	0.103961	0.109107	0.106163	0.111173		population SEM	0.0738312	0.0794571	0.0608959	0.080857	0.0950168	0.0682915	0.00479368	0.0145271
Blank Trials										Blank Trials
population mean	0.633588	0.772719	0.788355	0.715129	0.721504	0.803684	0.663341	0.581129		population mean	0.740732	0.700276	0.71493	0.811701	0.713027	0.519968	0.616077	0.719691
population SEM	0.0811704	0.0770612	0.126941	0.125694	0.095444	0.0773696	0.0708984	0.0758619		population SEM	0.0472494	0.0537116	0.0279718	0.0531855	0.0734569	0.103838	0.0387383	0.0406182
