# Supplementary material for: Learning speed and detection sensitivity controlled by distinct cortico-fugal neurons in visual cortex
Source: eLife. 2020 Dec 7;9:e59247. doi: 10.7554/eLife.59247 (PMC7748414; doi:10.7554/eLife.59247)
Supplement: Figure 4—figure supplement 1—source data 1. [file elife-59247-fig4-figsupp1-data1.xlsx]

## Sheet:  Figure 4 - figure supplement 1
aROC	pre Lesion				post Lesion
	session 1	session 2	session 3	session 4	session 1	session 2	session 3	session 4
Mouse 1	0.91275	0.96345	0.909048	0.897547	0.849937	0.696774	0.780461	0.732308
Mouse 2	0.986584	0.958474	0.950758	0.931949	0.961231	1	0.893942	0.941353
Mouse 3	0.918461	0.908579	0.882996	0.894231	0.978968	0.942939	0.88061	0.905458
Mouse 4	0.920518	0.960606	0.922128	0.92333	0.879182	0.870338	0.864923	NaN
Mouse 5	0.886504	0.959312	0.921422	0.889061	0.97366	0.859445	0.822368	0.940068
	Blank	Stim	Blank	Stim
FL Latency	pre Lesion	pre Lesion	post Lesion	post Lesion
Mouse 1	1.82191	0.651771	1.31486	0.779741
Mouse 2	1.99271	0.301411	1.75143	0.470744
Mouse 3	1.91662	0.591683	1.37332	0.577668
Mouse 4	1.52305	0.502415	0.985017	0.566226
Mouse 5	2.063	0.726552	1.40133	0.763965
	Blank	Stim	Blank	Stim
FL variability	pre Lesion	pre Lesion	post Lesion	post Lesion
Mouse 1	0.555906	0.137483	0.613642	0.210608
Mouse 2	0.85291	0.139228	0.670048	0.0370038
Mouse 3	0.781323	0.223233	0.936293	0.124891
Mouse 4	0.437612	0.167906	0.531433	0.406706
Mouse 5	0.671759	0.236253	0.680564	0.267012
