# Supplementary material for: Learning speed and detection sensitivity controlled by distinct cortico-fugal neurons in visual cortex
Source: eLife. 2020 Dec 7;9:e59247. doi: 10.7554/eLife.59247 (PMC7748414; doi:10.7554/eLife.59247)
Supplement: Figure 5—source data 1. [file elife-59247-fig5-data1.xlsx]

## Sheet: Figure 5A
Control Trials
contrast (%)	0	4	8	16	32	64	100
Mouse 1	0.5	0.510264	0.575269	0.571529	0.689753	0.58	0.623656
Mouse 2	0.5	0.776999	0.909677	0.917952	0.988834	0.996604	0.99439
Mouse 3	0.5	0.662634	0.750424	0.818996	0.808555	0.948253	0.96851
Mouse 4	0.5	0.65	0.793103	0.788462	0.793103	0.761905	0.82
Mouse 5	0.5	0.913194	1	1	0.998684	1	0.987195
Mouse 6	0.5	0.6649	0.77835	0.8013	0.8672	0.8672	0.87735
LED Trials
contrast (%)	0	4	8	16	32	64	100
Mouse 1	0.5	0.5	0.5	0.571429	0.6	0.7	0.642857
Mouse 2	0.5	0.5	0.735294	0.75	0.928571	1	1
Mouse 3	0.5	0.595588	0.529412	0.54902	0.658824	0.784314	0.847059
Mouse 4	0.5	0.55102	0.52381	0.519841	0.790476	0.85034	0.812325
Mouse 5	0.5	0.586081	0.687831	0.896359	0.952381	0.952381	0.952381
Mouse 6	0.5	0.5	0.55835	0.7435	0.72425	0.83705	0.9375

## Sheet: Figure 5B
aROC	contrast
pre CT lesion LED Off	0	4	8	16	32	1
population average	0.5	0.634969	0.689015	0.774545	0.820561	0.880691
population SEM	0	0.0296738	0.029781	0.0297063	0.0165898	0.0132842
pre CT lesion LED On
population average	0.5	0.595973	0.627646	0.698164	0.781598	0.918181
population SEM	0	0.0433504	0.045132	0.0417338	0.0406416	0.0231609
post CT lesion LED Off
population average	0.5	0.602737	0.649603	0.692834	0.742153	0.830486
population SEM	0	0.0244652	0.0393871	0.034405	0.0354564	0.021716
post CT lesion LED On
population average	0.5	0.620246	0.630439	0.675041	0.704383	0.776732
population SEM	0	0.03608	0.0401489	0.0487974	0.0606032	0.0362576
