# Supplementary material for: Learning speed and detection sensitivity controlled by distinct cortico-fugal neurons in visual cortex
Source: eLife. 2020 Dec 7;9:e59247. doi: 10.7554/eLife.59247 (PMC7748414; doi:10.7554/eLife.59247)
Supplement: Figure 6—source data 1. [file elife-59247-fig6-data1.xlsx]

## Sheet: Panel 6A
Control Trials
contrast (%)	0	4	8	16	32	64	100
Mouse 1	0.5	0.510264	0.575269	0.571529	0.689753	0.58	0.623656
Mouse 2	0.5	0.776999	0.909677	0.917952	0.988834	0.996604	0.99439
Mouse 3	0.5	0.662634	0.750424	0.818996	0.808555	0.948253	0.96851
Mouse 4	0.5	0.65	0.793103	0.788462	0.793103	0.761905	0.82
Mouse 5	0.5	0.913194	1	1	0.998684	1	0.987195
Mouse 6	0.5	0.6649	0.77835	0.8013	0.8672	0.8672	0.87735
LED Trials
contrast (%)	0	4	8	16	32	64	100
Mouse 1	0.5	0.5	0.5	0.571429	0.6	0.7	0.642857
Mouse 2	0.5	0.5	0.735294	0.75	0.928571	1	1
Mouse 3	0.5	0.595588	0.529412	0.54902	0.658824	0.784314	0.847059
Mouse 4	0.5	0.55102	0.52381	0.519841	0.790476	0.85034	0.812325
Mouse 5	0.5	0.586081	0.687831	0.896359	0.952381	0.952381	0.952381
Mouse 6	0.5	0.5	0.55835	0.7435	0.72425	0.83705	0.9375

## Sheet: Panel 6B
	training days	Threshold Modulation Index
Mouse 1	16	0.450847
Mouse 2	17	0.596118
Mouse 3	28	0.484784
Mouse 4	31	0.373434
Mouse 5	40	0.19
Mouse 6	43.5	0.21
Mouse 7	44	0.677143
Mouse 8	45	0.692623
Mouse 9	50	0.423416
Mouse 10	64	0.203047
Mouse 11	68	0.236614
Mouse 12	70	0.935662
Mouse 13	75	0.677143
Mouse 14	113	0.110162
Mouse 15	117.5	0.00325126
Mouse 16	131	-0.53248

## Sheet: Panel 6C
	training days	Threshold Modulation Index
Mouse 1	16	0.450847
Mouse 2	17	0.596118
Mouse 3	28	0.484784
Mouse 4	31	0.373434
Mouse 5	40	0.19
Mouse 6	43.5	0.21
Mouse 7	44	0.677143
Mouse 8	45	0.692623
Mouse 9	50	0.423416
Mouse 10	64	0.203047
Mouse 11	68	0.236614
Mouse 12	70	0.935662
Mouse 13	75	0.677143
Mouse 14	113	0.110162
Mouse 15	117.5	0.00325126
Mouse 16	131	-0.53248

## Sheet: Panel 6D
norm. FR (MUA)
contrast (%)	4	8	16	32	64	100
Control	0.262	0.501	0.471	0.504	0.848	1
VC Silencning	0.021	0.012	0.041	0.224	0.421	0.619

## Sheet: Panel 6E
norm. FR (MUA)
contrast (%)	4	8	16	32	64	100
Control	0.005	0.134	0.293	0.449	0.882	0.881
VC Silencning	0.01	0.21	0.351	53.6	0.757	0.836

## Sheet: Panel 6F
residual response after VC silencing
	2-7 weeks	10-17 weeks	2-7 weeks	10-17 weeks	2-7 weeks	10-17 weeks
	SGS	SGS	SO	SO	SI	SI
mean	1.021	1.045	0.651	0.697	0.193	0.681
SEM	0.069	0.122	0.094	0.088	0.154	0.12
