# Supplementary material for: Learning speed and detection sensitivity controlled by distinct cortico-fugal neurons in visual cortex
Source: eLife journal article supplement (doi:10.7554/elife.59247), 2020-12-07
Supplement: supp [file elife-59247-supp-v1.zip]

**Figure 1 - figure supplement 1**

**A**

### Trial structure

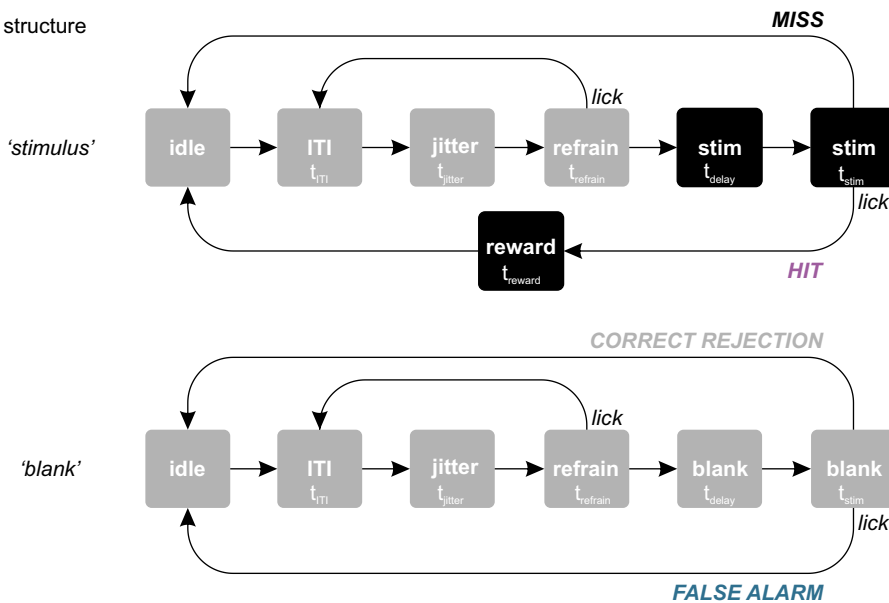

**B**

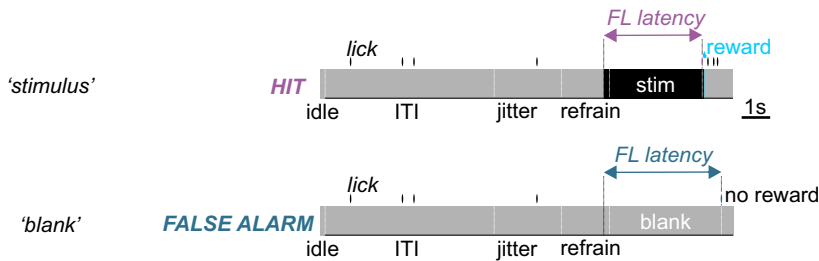

**C**

| Day | $t_{TI}$ (s) | $t_{jitter}$ (s) | $t_{refrain}$ (s) | $t_{delay}$ (s) | $t_{stim}$ (s) | $t_{reward}$ (s) |
|-----|--------------|------------------|-------------------|-----------------|----------------|------------------|
| 1-2 | 4            | 3                | 1.5               | 0.25            | up to 4        | 0.14             |
| 3-4 | 5            | 5                | 1.5               | 0.20            | up to 4        | 0.14             |
| 5-6 | 5            | 6                | 1.5               | 0.20            | up to 4        | 0.14             |
| 7   | 6            | 6                | 1.5               | 0.20            | up to 4        | 0.14             |
| 8   | 6            | 6                | 1.5               | 0.15            | up to 4        | 0.14             |
| 9   | 6            | 7                | 1.5               | 0.15            | up to 4        | 0.14             |
| >10 | 7            | 7                | 1.5               | 0.10            | up to 4        | 0.14             |

**Table 1.** Behavioral training parameters
