# Supplementary figures and images for: Learning speed and detection sensitivity controlled by distinct cortico-fugal neurons in visual cortex
Source: eLife journal article supplement (doi:10.7554/elife.59247), 2020-12-07

Figure 1 - figure supplement 6

A

retroAAV-cre control

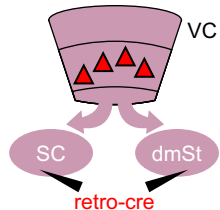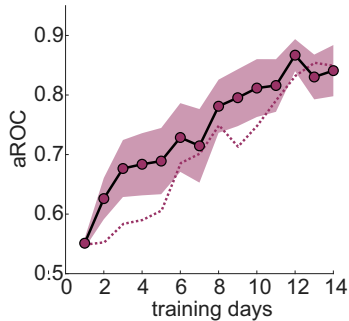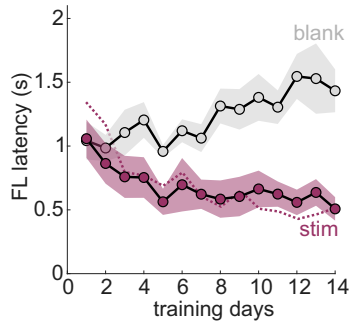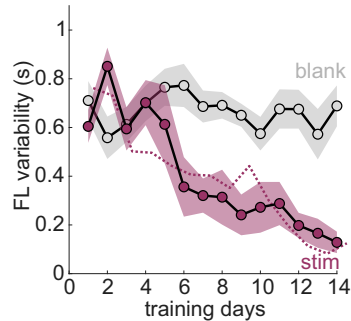

Supplement: supp [file elife-59247-supp-v1.zip]

**Figure 1 - figure supplement 3**

**A**

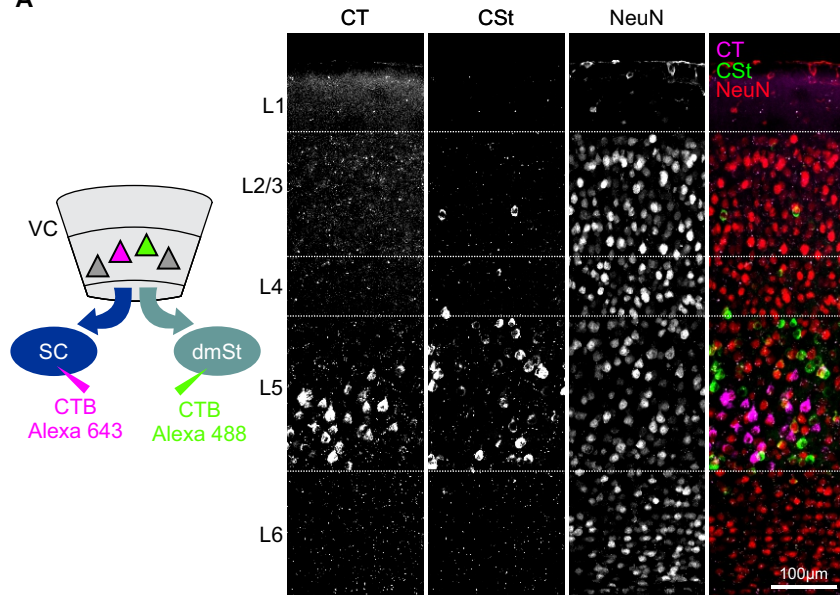

**B**

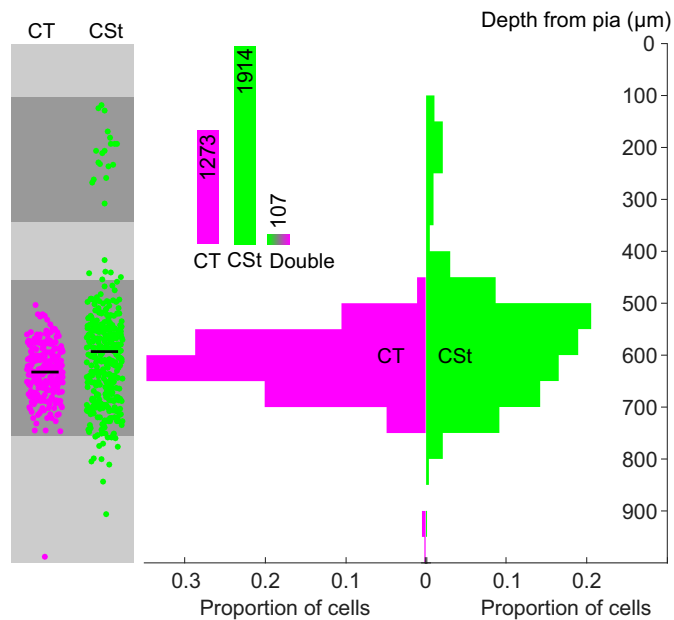

Supplement: supp [file elife-59247-supp-v1.zip]

Figure 1 - figure supplement 4

A

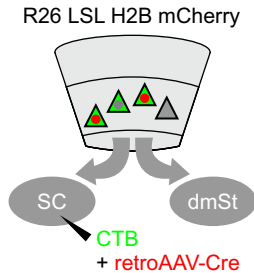

B

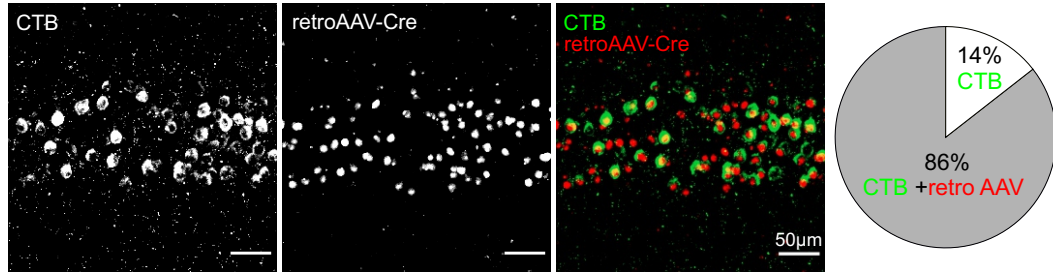

Supplement: supp [file elife-59247-supp-v1.zip]

**Figure 4 - figure supplement 1**

**A**

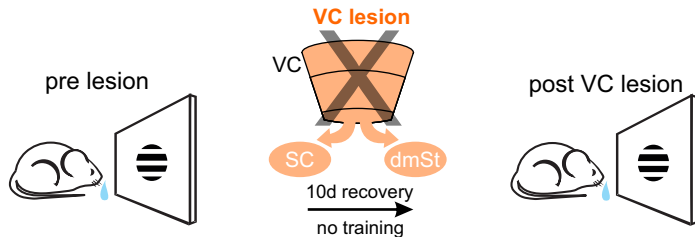

**B**

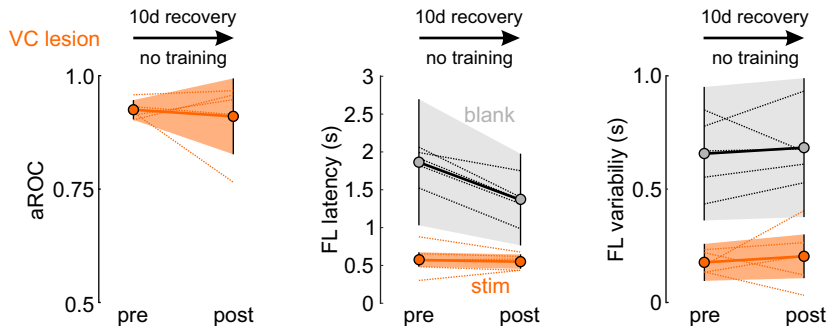

Supplement: supp [file elife-59247-supp-v1.zip]

Figure Supplement 2

A

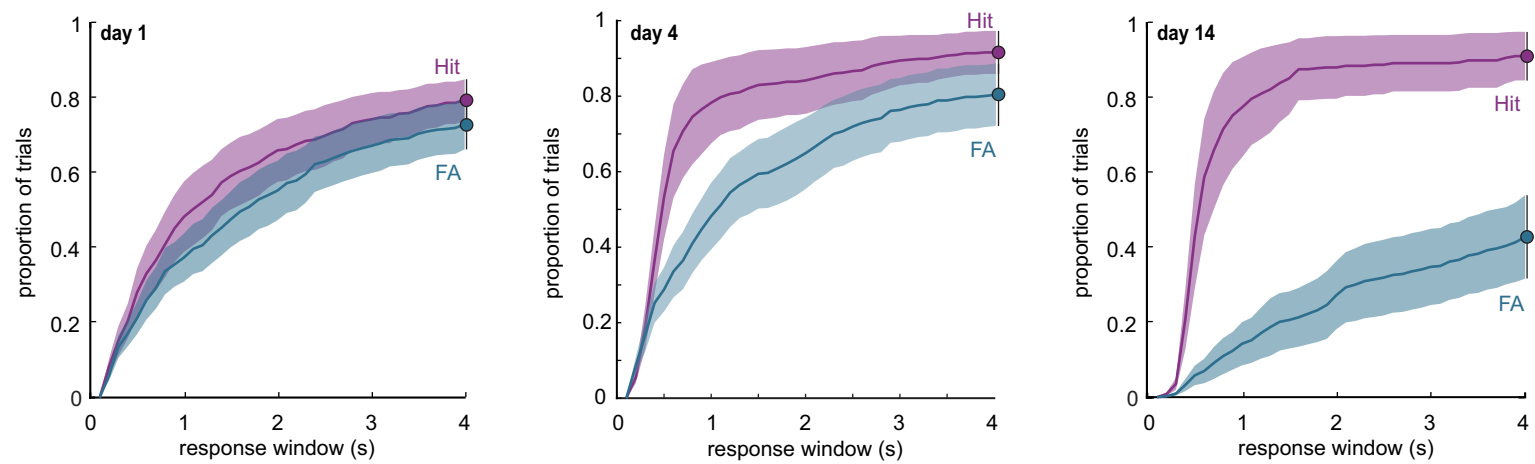

B

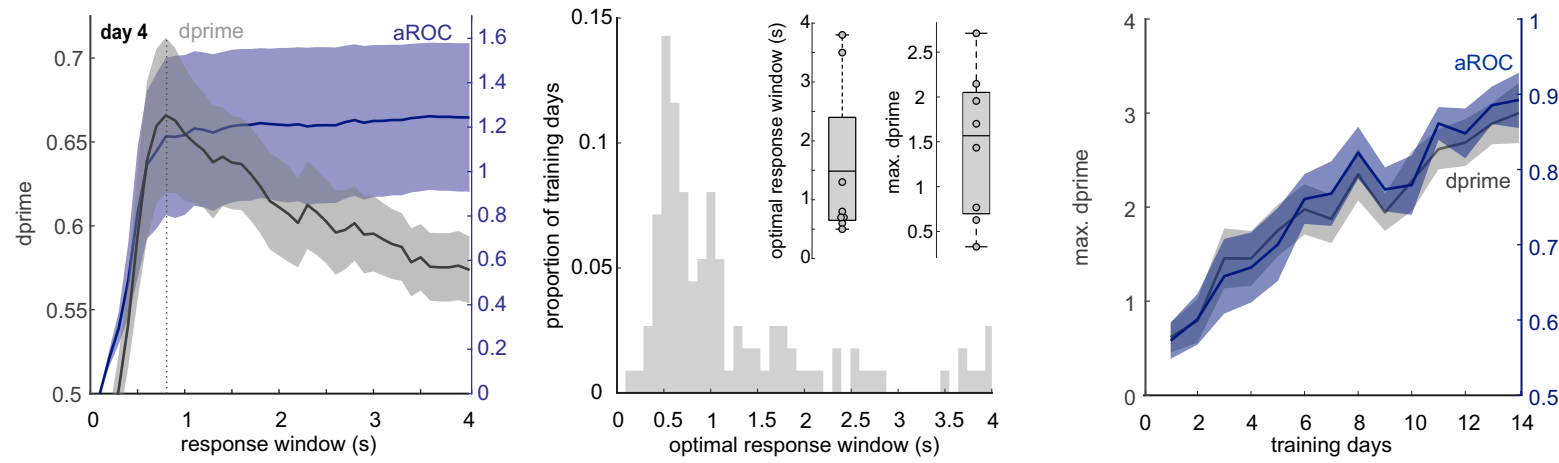

Supplement: supp [file elife-59247-supp-v1.zip]

Figure 1 - figure supplement 5

A

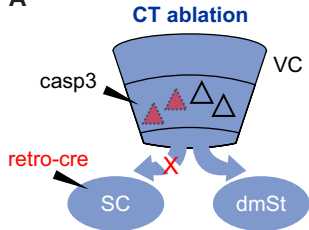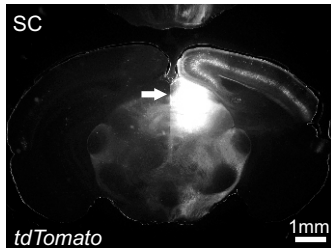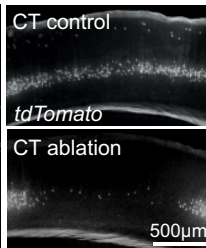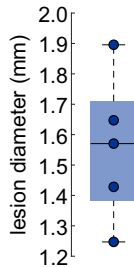

B

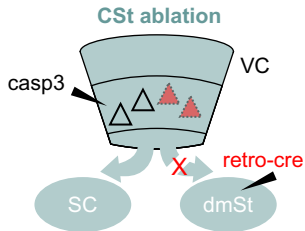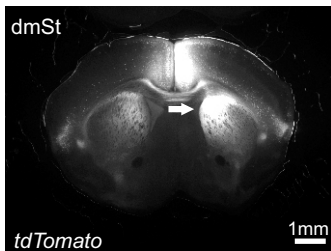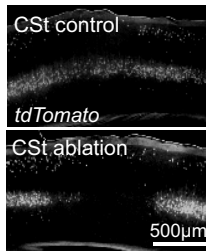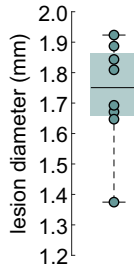

Supplement: supp [file elife-59247-supp-v1.zip]

**Figure 2 - figure supplement 1**

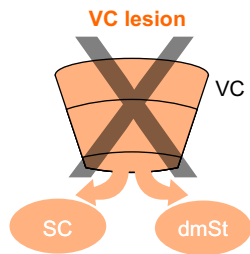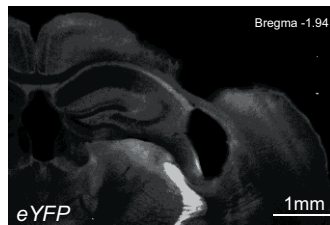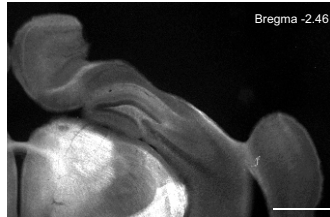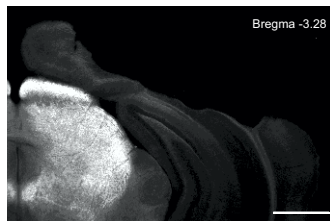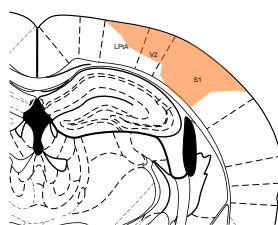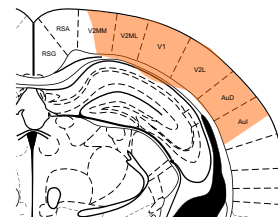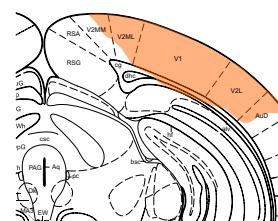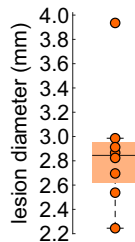

Supplement: supp [file elife-59247-supp-v1.zip]
